# Supplementary material for: A novel pathogenic pathway of immune activation detectable before clinical onset in Huntington's disease
Source: PubMed Central journal article supplement — J Exp Med. 2008 Aug 4;205(8):1869–77. doi: 10.1084/jem.20080178 (PMC2525598; doi:10.1084/jem.20080178), 2008-08-04
Supplement: jem.20080178_2.pdf [file jem.20080178_2.pdf]

**Table S1.** Clinical characteristics of subjects in each human biofluid study

| Experiment               | Disease stage | Number of subjects | Female/male | Mean age (range) |
|--------------------------|---------------|--------------------|-------------|------------------|
| Cytokine multiplex assay | Control       | 69                 | 43:26       | 42 (22–67)       |
|                          | Premanifest   | 34                 | 19:15       | 39 (23–54)       |
| Plasma                   | Early         | 47                 | 24:23       | 47 (25–80)       |
|                          | Moderate      | 44                 | 30:14       | 52 (38–76)       |
| IgA, IgM assay           | Control       | 26                 | 18:8        | 46 (29–65)       |
|                          | Premanifest   | 11                 | 5:6         | 39 (27–49)       |
|                          | Early         | 17                 | 9:8         | 47 (31–61)       |
| Plasma                   | Moderate      | 18                 | 14:4        | 50 (26–76)       |
|                          | Control       | 19                 | 11:8        | 40 (26–67)       |
|                          | Premanifest   | 17                 | 9:8         | 38 (27–47)       |
| IgG assay                | Early         | 13                 | 8:5         | 42 (25–60)       |
|                          | Moderate      | 20                 | 11:9        | 51 (38–74)       |
|                          | Control       | 24                 | 20:4        | 37 (22–67)       |
| GM-CSF assay             | Premanifest   | 24                 | 15:9        | 38 (27–54)       |
|                          | Early         | 24                 | 14:10       | 48 (25–80)       |
|                          | Moderate      | 28                 | 17:11       | 51 (26–77)       |
| IL-6 and IL-8 assay      | Control       | 9                  | 6:3         | 45 (25–66)       |
|                          | Early         | 9                  | 4:5         | 51 (38–64)       |
|                          | Moderate      | 28                 | 1:10        | 53 (38–72)       |

**Table S2.** Plasma cytokine levels by disease stage measured by multiplex ELISA assay

|               | Control     |          | Premanifest HD |          | Early HD    |          | Moderate HD  |          |
|---------------|-------------|----------|----------------|----------|-------------|----------|--------------|----------|
|               | Mean (SD)   | <i>n</i> | Mean (SD)      | <i>n</i> | Mean (SD)   | <i>n</i> | Mean (SD)    | <i>n</i> |
| IL-6          | 3.06 (2)    | 69       | 5.26 (2.66)    | 34       | 5.3 (3.01)  | 47       | 6.65 (3.46)  | 46       |
| IL-8          | 2.11 (1.03) | 69       | 2.27 (0.97)    | 34       | 3.08 (1.47) | 47       | 3.98 (2.67)  | 46       |
| IL-4          | 0.32 (0.38) | 68       | 0.58 (0.88)    | 34       | 0.63 (0.71) | 45       | 0.84 (0.78)  | 45       |
| IL-10         | 0.87 (0.87) | 66       | 1.85 (2.75)    | 34       | 1.67 (1.68) | 45       | 2.15 (3.06)  | 44       |
| TNF- $\alpha$ | 2.62 (1.25) | 69       | 3.04 (1.51)    | 34       | 3.03 (1.27) | 47       | 3.32 (1.05)  | 46       |
| IL-5          | 0.34 (0.23) | 66       | 0.38 (0.33)    | 34       | 0.49 (0.88) | 45       | 0.53 (0.5)   | 46       |
| IL-2          | 0.86 (0.99) | 66       | 1.06 (0.79)    | 34       | 1.01 (0.96) | 45       | 1.51 (4.63)  | 46       |
| IFN- $\gamma$ | 0.54 (0.58) | 66       | 0.38 (0.39)    | 34       | 0.44 (0.44) | 45       | 0.77 (0.76)  | 46       |
| IL-13         | 3.17 (2.62) | 66       | 1.84 (1.46)    | 34       | 2.48 (2.23) | 45       | 2.35 (12.49) | 46       |
| IL-12         | 1.38 (1.11) | 66       | 1.31 (1.32)    | 34       | 1.97 (2.11) | 45       | 0.85 (1.5)   | 45       |
| IL-1 $\beta$  | 0.83 (0.82) | 69       | 0.81 (0.87)    | 34       | 0.85 (0.89) | 47       | 0.74 (0.77)  | 46       |
| GM-CSF        | 0.19 (0.16) | 23       | 0.17 (0.12)    | 24       | 0.39 (0.48) | 24       | 0.08 (0.1)   | 36       |
| IL-6          | 3.06 (2)    | 69       | 5.26 (2.66)    | 34       | 5.3 (3.01)  | 47       | 6.65 (3.46)  | 46       |
| IL-8          | 2.11 (1.03) | 69       | 2.27 (0.97)    | 34       | 3.08 (1.47) | 47       | 3.98 (2.67)  | 46       |
| IL-4          | 0.32 (0.38) | 68       | 0.58 (0.88)    | 34       | 0.63 (0.71) | 45       | 0.84 (0.78)  | 45       |
| IL-10         | 0.87 (0.87) | 66       | 1.85 (2.75)    | 34       | 1.67 (1.68) | 45       | 2.15 (3.06)  | 44       |

All cytokine levels are in ng/L.

**Table S3.** Demographic, clinical, and pathological characteristics of subjects in postmortem striatal expression study

| Group   | n  | Female/<br>male | Mean age at<br>death (Range) | Mean CAG repeat<br>length (SD) | Relative RNA quantification,<br>% of controls (SD) |             |               |
|---------|----|-----------------|------------------------------|--------------------------------|----------------------------------------------------|-------------|---------------|
|         |    |                 |                              |                                | IL-6                                               | IL-8        | TNF- $\alpha$ |
| Control | 6  | 0:6             | 59 (42–74)                   |                                | 100 (88.3)                                         | 100 (40.1)  | 100 (60.8)    |
| HD      | 17 | 3:14            | 54 (40–74)                   | 45 (5)                         | 1520 (159)                                         | 1110 (125)  | 208 (110)     |
| VS1     | 4  | 0:4             | 50 (41–58)                   | 41 (3)                         | 4220 (147)                                         | 596 (108)   | 382 (235)     |
| VS2     | 4  | 0:4             | 62 (47–74)                   | 45 (4)                         | 694 (122)                                          | 402 (73.6)  | 92.1 (153)    |
| VS3     | 4  | 0:4             | 54 (40–64)                   | 45 (4)                         | 3210 (195)                                         | 1950 (152)  | 306 (75.8)    |
| VS4     | 5  | 3:2             | 49 (45–53)                   | 53 (4) <sup>a</sup>            | 775 (218)                                          | 2740 (36.7) | 684 (57.7)    |

<sup>a</sup>CAG repeat lengths available for two samples only.

VS, Vonsattel pathological grade (Vonsattel, J.P., R.H. Myers, T.J. Stevens, R.J. Ferrante, E.D. Bird, and E.P.

Richardson Jr. 1985. *J. Neuropathol. Exp. Neurol.* 44:559–577).

**Table S4.** Details of animals used for murine experiments

| Experiment                                                 | Mouse model                      | Age of animals | No. WT animals | No. disease animals |
|------------------------------------------------------------|----------------------------------|----------------|----------------|---------------------|
| Serum cytokine                                             | R6/2                             | 12 wk          | 20             | 20                  |
| multiplex assay                                            | <i>Hdh</i> <sup>Q150Q/Q150</sup> | 22 mo          | 10             | 9                   |
| Macrophage<br>stimulation study<br>and serum IL-6<br>ELISA | YAC128                           | 12 mo          | 3              | 4                   |
|                                                            | YAC18                            | 12 mo          | 4              | 4                   |
| Microglial<br>stimulation study                            | R6/2                             | Neonatal       | 4              | 4                   |

**Table S5.** Details of subjects whose blood was used for human monocyte studies

| Huntingtin expression study | Sex      | Age         | Status        | Disease stage <sup>a</sup>              | CAG sizes |
|-----------------------------|----------|-------------|---------------|-----------------------------------------|-----------|
| C1                          | F        | 45.8        | Control       |                                         |           |
| C2                          | M        | 43.8        | Control       |                                         |           |
| HD1                         | M        | 41.9        | HD            | 2                                       | 17/45     |
| HD2                         | F        | 44.2        | HD            | 2                                       | 25/43     |
| HD3                         | F        | 61.4        | HD            | 2                                       | 16/42     |
| Monocyte functional study   | <i>n</i> | Female/male | Mean age (SD) | Mean expanded CAG repeat length (range) |           |
| Controls                    | 8        | 2:7         | 42.2 (10.3)   |                                         |           |
| Premanifest HD              | 9        | 4:4         | 38.8 (6.2)    | 43.5 (41–48)                            |           |

<sup>a</sup>Shoulson, I., and S. Fahn. 1979. *Neurology*. 29:1–3.

**Table S6.** Primers used for human monocyte expression studies

| Gene              | Forward primer               | Reverse primer  | Probe (5'-FAM, 3'-TAMRA) |
|-------------------|------------------------------|-----------------|--------------------------|
| Abl               | TGGAGATAACACTCT              | GATGTAGTTGCTTGG | CCATTTTTGGTTTGG          |
|                   | AAGCATAACTAAAG               | GACCCA          | GCTTCACACCATT            |
|                   | GT                           |                 |                          |
| β-2-microglobulin | GAGTATGCCTGCCGT              | AATCCAAATGCGGCA | CCTCCATGATGCTGC          |
|                   | GTG                          | TCT             | TTACATGTCTC              |
| Huntingtin        | GCTGCACCGACCGTG              | CGCAGGCTGCAGGGT | CAGCTCCCTGTCCCG          |
|                   | AGT                          | TAC             | GCGG                     |
| CAG repeat sizing | ATGAAGGCCTTCGAG              | GGCGGCTGAGGAAG  | N/A                      |
|                   | TCCCTCAAGTCCTTC <sup>a</sup> | CTGAGGA         |                          |

<sup>a</sup>FAM-tagged primer.
